# Supplementary material for: Genetic determinants of glucose-6-phosphate dehydrogenase activity in Kenya
Source: Springer Nature journal article supplement (doi:10.1186/s12881-014-0093-6), 2014-09-08
Supplement: MOESM2 [file 9741114]

**Table S1. SNP summary table.** Shown here for each SNP assayed is: the genomic position (hg19/GRCh37), observed alleles (on the [+] strand, according to UCSC Genome Browser), ancestral allele (according to the Ensembl EPO pipeline), G6PD exon-intron position (according to UCSC genome annotation coordinates), and derived allele frequency stratified by sex. Key: E=exon, I=intron, US=upstream, DS=downstream. NB: c.202 and c.376 are referred to by their coding strand (-) allele designations throughout for clarity.

| Name              | Position (build 37) | Observed Alleles | Ancestral Allele | G6PD - Exon/Intron | DAF (male) | DAF (female) |
|-------------------|---------------------|------------------|------------------|--------------------|------------|--------------|
| rs763737          | 153278307           | G/A              | G                | DS                 | 0.611      | 0.607        |
| rs766420          | 153554404           | G/C              | G                | DS                 | 0.361      | 0.321        |
| rs915941          | 153626649           | C/A              | C                | DS                 | 0.481      | 0.462        |
| rs915942          | 153626738           | G/A              | G                | DS                 | 0.421      | 0.429        |
| rs762513          | 153675171           | A/G              | A                | DS                 | 0.310      | 0.311        |
| rs28470352        | 153753490           | T/A              | T                | DS                 | 0.391      | 0.391        |
| rs61042368        | 153755336           | G/A              | G                | DS                 | 0.111      | 0.110        |
| rs12389569        | 153757734           | G/A              | G                | DS                 | 0.067      | 0.072        |
| rs12393550        | 153758660           | G/A              | G                | DS                 | 0.390      | 0.387        |
| rs77214077        | 153760429           | G/A              | G                | E12                | 0.129      | 0.113        |
| rs2071429         | 153760508           | A/G              | A                | I11                | 0.925      | 0.921        |
| rs2230037         | 153760654           | G/A              | G                | E11                | 0.253      | 0.265        |
| rs2230036         | 153760953           | C/T              | C                | E10                | 0.104      | 0.098        |
| rs73573478        | 153761564           | G/A              | G                | I8                 | 0.105      | 0.103        |
| rs5986990         | 153761628           | G/A              | G                | I8                 | 0.391      | 0.392        |
| rs2515905         | 153762075           | G/A              | G                | I7                 | 0.269      | 0.259        |
| rs2515904         | 153762771           | G/C              | G                | I5                 | 0.265      | 0.256        |
| c.376 (rs1050829) | 153763492           | T/C              | T                | E5                 | 0.400      | 0.395        |
| c.202 (rs1050828) | 153764217           | C/T              | C                | E4                 | 0.162      | 0.183        |
| rs762515          | 153764528           | T/C              | T                | I2                 | 0.403      | 0.400        |
| rs762516          | 153764663           | C/T              | C                | I2                 | 0.262      | 0.253        |
| rs73641103        | 153769889           | G/A              | G                | I2                 | 0.018      | 0.012        |
| rs113492957       | 153773062           | C/T              | C                | I2                 | 0.105      | 0.101        |
| rs149902811       | 153773160           | A/C              | A                | I2                 | 0.014      | 0.021        |
| rs111827785       | 153775785           | T/C              | C                | US                 | 0.488      | 0.484        |
| rs4898389         | 153827637           | A/G              | A                | US                 | 0.935      | 0.928        |
| rs5986877         | 153828269           | C/G              | C                | US                 | 0.926      | 0.918        |
| rs7879049         | 153829693           | A/G              | A                | US                 | 0.323      | 0.323        |
| rs7053878         | 153834100           | T/A              | T                | US                 | 0.063      | 0.072        |
| rs60030796        | 153836171           | A/G              | A                | US                 | 0.073      | 0.068        |
