# Supplementary material for: Genetic determinants of glucose-6-phosphate dehydrogenase activity in Kenya
Source: Springer Nature journal article supplement (doi:10.1186/s12881-014-0093-6), 2014-09-08
Supplement: MOESM3 [file 9741114]

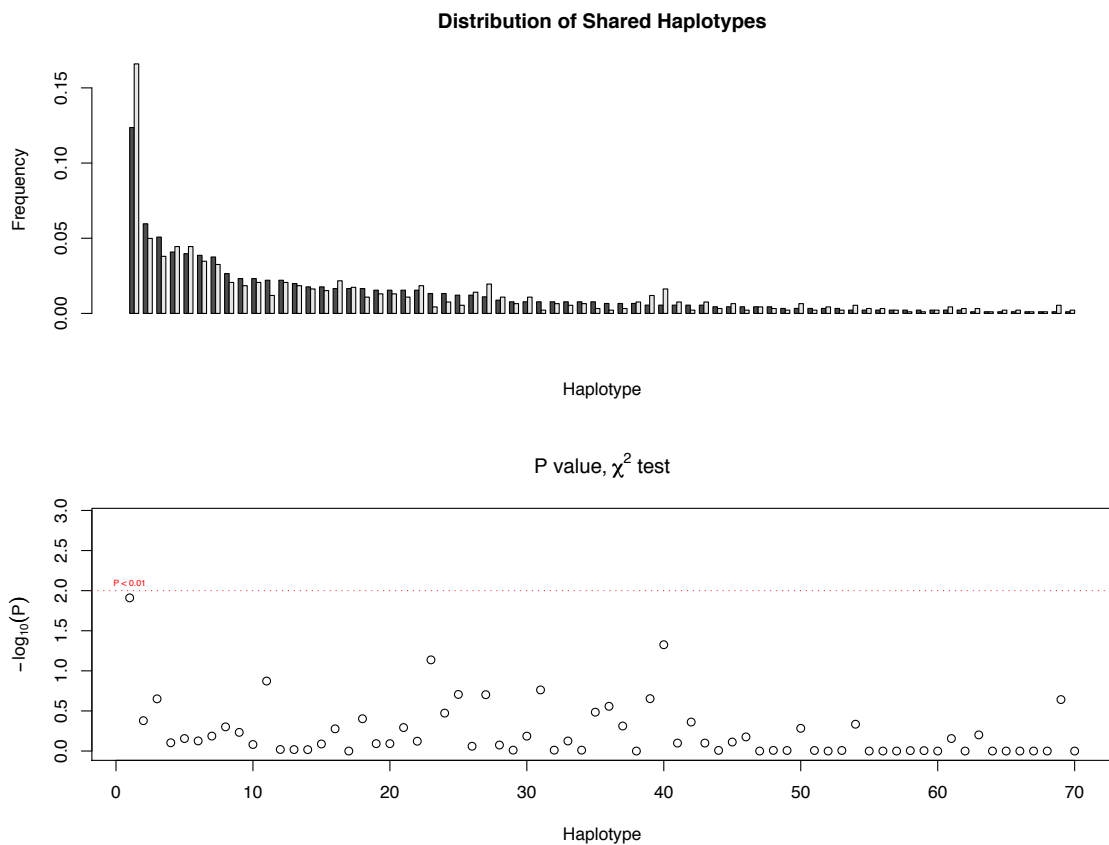

**Figure S2. Haplotype distribution in males vs. females.** The frequency of each haplotype is plotted in decreasing order, stratified by sex (top). No significant differences between male and female haplotype frequencies were found, attesting to highly accurate haplotype phasing (bottom).
