# Supplementary material for: Genetic determinants of glucose-6-phosphate dehydrogenase activity in Kenya
Source: Springer Nature journal article supplement (doi:10.1186/s12881-014-0093-6), 2014-09-08
Supplement: MOESM4 [file 9741114]

|             | Position  | DAF   |        | Additive |                       | Dominant |                       | Recessive |                       |
|-------------|-----------|-------|--------|----------|-----------------------|----------|-----------------------|-----------|-----------------------|
|             |           | Male  | Female | P        | Effect Size           | P        | Effect Size           | P         | Effect Size           |
|             |           |       |        |          |                       |          |                       |           |                       |
| c.202       | 153764217 | 0.162 | 0.183  | 1.5e-200 | -0.22 (-0.23 - -0.21) | 8.1e-163 | -0.30 (-0.32 - -0.28) | 2.8e-147  | -0.44 (-0.47 - -0.41) |
| rs762516    | 153764663 | 0.262 | 0.253  | 5.5e-127 | -0.15 (-0.17 - -0.14) | 9.7e-110 | -0.23 (-0.25 - -0.21) | 1.1e-96   | -0.30 (-0.32 - -0.27) |
| rs2515904   | 153762771 | 0.265 | 0.256  | 1.2e-124 | -0.15 (-0.16 - -0.14) | 1.5e-107 | -0.23 (-0.24 - -0.21) | 2.0e-95   | -0.29 (-0.32 - -0.27) |
| rs2515905   | 153762075 | 0.269 | 0.259  | 3.7e-124 | -0.15 (-0.16 - -0.14) | 1.4e-108 | -0.23 (-0.24 - -0.21) | 1.2e-93   | -0.29 (-0.31 - -0.26) |
| rs28470352  | 153753490 | 0.391 | 0.391  | 1.0e-79  | -0.11 (-0.12 - -0.10) | 6.4e-69  | -0.18 (-0.20 - -0.16) | 2.9e-65   | -0.20 (-0.22 - -0.18) |
| rs5986990   | 153761628 | 0.391 | 0.392  | 1.9e-79  | -0.11 (-0.12 - -0.10) | 1.2e-68  | -0.18 (-0.20 - -0.16) | 6.1e-65   | -0.20 (-0.22 - -0.18) |
| rs12393550  | 153758660 | 0.390 | 0.387  | 6.4e-79  | -0.11 (-0.12 - -0.10) | 1.1e-69  | -0.18 (-0.20 - -0.16) | 1.2e-62   | -0.20 (-0.22 - -0.17) |
| c.376       | 153763492 | 0.400 | 0.395  | 1.4e-78  | -0.11 (-0.12 - -0.10) | 4.0e-68  | -0.18 (-0.20 - -0.16) | 3.0e-64   | -0.20 (-0.22 - -0.17) |
| rs762513    | 153675171 | 0.310 | 0.311  | 5.0e-78  | -0.12 (-0.13 - -0.10) | 9.8e-73  | -0.18 (-0.20 - -0.17) | 2.3e-56   | -0.21 (-0.23 - -0.18) |
| rs762515    | 153764528 | 0.403 | 0.400  | 1.2e-77  | -0.11 (-0.12 - -0.10) | 1.3e-68  | -0.18 (-0.20 - -0.16) | 3.6e-62   | -0.19 (-0.21 - -0.17) |
| rs915941    | 153626649 | 0.481 | 0.462  | 3.7e-53  | -0.09 (-0.10 - -0.08) | 3.4e-47  | -0.15 (-0.17 - -0.13) | 3.0e-43   | -0.15 (-0.17 - -0.13) |
| rs11827785  | 153775785 | 0.488 | 0.484  | 4.2e-49  | +0.09 (+0.07 - +0.10) | 4.5e-41  | +0.14 (+0.12 - +0.16) | 1.2e-42   | +0.15 (+0.13 - +0.17) |
| rs915942    | 153626738 | 0.421 | 0.429  | 6.4e-40  | +0.08 (+0.07 - +0.09) | 2.2e-33  | +0.13 (+0.11 - +0.15) | 8.1e-35   | +0.14 (+0.12 - +0.17) |
| rs2230037   | 153760654 | 0.253 | 0.265  | 2.4e-29  | +0.08 (+0.06 - +0.09) | 3.4e-25  | +0.11 (+0.09 - +0.13) | 1.9e-24   | +0.15 (+0.12 - +0.17) |
| rs7879049   | 153829693 | 0.323 | 0.323  | 5.0e-25  | +0.07 (+0.05 - +0.08) | 1.3e-20  | +0.10 (+0.08 - +0.12) | 3.1e-22   | +0.13 (+0.10 - +0.15) |
| rs766420    | 153554404 | 0.361 | 0.321  | 2.2e-12  | +0.04 (+0.03 - +0.06) | 4.0e-11  | +0.07 (+0.05 - +0.09) | 2.5e-10   | +0.08 (+0.06 - +0.11) |
| rs61042368  | 153755336 | 0.111 | 0.110  | 2.1e-06  | +0.05 (+0.03 - +0.06) | 8.6e-06  | +0.06 (+0.04 - +0.09) | 5.1e-05   | +0.09 (+0.05 - +0.13) |
| rs763737    | 153278307 | 0.611 | 0.607  | 9.0e-06  | -0.03 (-0.04 - -0.02) | 5.5e-06  | -0.05 (-0.08 - -0.03) | 2.2e-04   | -0.04 (-0.06 - -0.02) |
| rs113492957 | 153773062 | 0.105 | 0.101  | 4.3e-05  | +0.04 (+0.02 - +0.06) | 1.2e-04  | +0.06 (+0.03 - +0.08) | 5.3e-04   | +0.08 (+0.03 - +0.13) |
| rs2230036   | 153760953 | 0.104 | 0.098  | 5.5e-05  | +0.04 (+0.02 - +0.06) | 1.8e-04  | +0.05 (+0.03 - +0.08) | 4.7e-04   | +0.08 (+0.04 - +0.13) |
| rs73573478  | 153761564 | 0.105 | 0.103  | 7.3e-05  | +0.04 (+0.02 - +0.06) | 2.5e-04  | +0.05 (+0.02 - +0.08) | 5.3e-04   | +0.08 (+0.03 - +0.13) |
| rs77214077  | 153760429 | 0.129 | 0.113  | 1.5e-04  | +0.03 (+0.02 - +0.05) | 1.4e-04  | +0.05 (+0.03 - +0.08) | 3.3e-03   | +0.06 (+0.02 - +0.10) |
| rs12389569  | 153757734 | 0.067 | 0.072  | 2.6e-03  | +0.04 (+0.01 - +0.06) | 1.3e-02  | +0.04 (+0.01 - +0.08) | 1.9e-03   | +0.09 (+0.03 - +0.14) |
| rs4898389   | 153827637 | 0.935 | 0.928  | 3.0e-03  | -0.04 (-0.06 - -0.01) | 7.1e-02  | -0.05 (-0.11 - +0.00) | 1.3e-03   | -0.05 (-0.09 - -0.02) |
| rs2071429   | 153760508 | 0.925 | 0.921  | 6.8e-02  | -0.02 (-0.04 - +0.00) | 2.5e-01  | -0.03 (-0.08 - +0.02) | 5.0e-02   | -0.03 (-0.06 - -0.00) |
| rs5986877   | 153828269 | 0.926 | 0.918  | 7.1e-02  | -0.02 (-0.04 - +0.00) | 2.6e-01  | -0.03 (-0.08 - +0.02) | 5.1e-02   | -0.03 (-0.06 - +0.00) |
| rs149902811 | 153773160 | 0.014 | 0.021  | 8.9e-02  | +0.04 (-0.01 - +0.09) | 7.9e-02  | +0.06 (-0.01 - +0.12) | 3.2e-01   | +0.06 (-0.06 - +0.18) |
| rs7053878   | 153834100 | 0.063 | 0.072  | 1.0e-01  | +0.02 (-0.00 - +0.04) | 1.7e-01  | +0.02 (-0.01 - +0.06) | 9.9e-02   | +0.05 (-0.01 - +0.10) |
| rs60030796  | 153836171 | 0.073 | 0.068  | 6.5e-01  | +0.01 (-0.02 - +0.03) | 8.6e-01  | -0.00 (-0.04 - +0.03) | 1.8e-01   | +0.04 (-0.02 - +0.09) |
| rs73641103  | 153769889 | 0.018 | 0.012  | 9.3e-01  | -0.00 (-0.05 - +0.04) | 8.7e-01  | -0.01 (-0.08 - +0.06) | 9.6e-01   | +0.00 (-0.11 - +0.11) |

**Table S2. Initial association test results.** Shown here for each SNP surveyed is: genomic position (hg19/GRCh37), DAF stratified by sex, P values and effect sizes (with 95% CI) for initial, uncontrolled association tests under three different genetic models.
