# Supplementary material for: Genetic determinants of glucose-6-phosphate dehydrogenase activity in Kenya
Source: Springer Nature journal article supplement (doi:10.1186/s12881-014-0093-6), 2014-09-08
Supplement: MOESM5 [file 9741114]

|             | Position  | DAF   |        | Additive |                       |         | Dominant              |         |                       | Recessive |             |  |
|-------------|-----------|-------|--------|----------|-----------------------|---------|-----------------------|---------|-----------------------|-----------|-------------|--|
|             |           | Male  | Female | P        | Effect Size           | P       | Effect Size           | P       | Effect Size           | P         | Effect Size |  |
|             |           |       |        |          |                       |         |                       |         |                       |           |             |  |
| rs2230037   | 153760654 | 0.253 | 0.265  | 9.3e-08  | +0.03 (+0.02 - +0.04) | 1.3e-07 | +0.05 (+0.03 - +0.07) | 6.2e-10 | +0.08 (+0.05 - +0.10) |           |             |  |
| rs762515    | 153764528 | 0.403 | 0.400  | 1.4e-06  | -0.03 (-0.04 - -0.02) | 1.5e-07 | -0.05 (-0.07 - -0.03) | 4.6e-11 | -0.08 (-0.10 - -0.05) |           |             |  |
| c.376       | 153763492 | 0.400 | 0.395  | 1.7e-06  | -0.03 (-0.04 - -0.02) | 4.4e-07 | -0.05 (-0.07 - -0.03) | 2.0e-11 | -0.08 (-0.10 - -0.06) |           |             |  |
| rs5986990   | 153761628 | 0.391 | 0.392  | 2.8e-06  | -0.03 (-0.04 - -0.02) | 7.0e-07 | -0.05 (-0.07 - -0.03) | 5.9e-12 | -0.08 (-0.10 - -0.06) |           |             |  |
| rs28470352  | 153753490 | 0.391 | 0.391  | 4.7e-06  | -0.03 (-0.04 - -0.02) | 1.0e-06 | -0.05 (-0.07 - -0.03) | 1.2e-11 | -0.08 (-0.10 - -0.06) |           |             |  |
| rs915942    | 153626738 | 0.421 | 0.429  | 4.8e-06  | +0.02 (+0.01 - +0.03) | 2.0e-08 | +0.05 (+0.03 - +0.07) | 6.4e-12 | +0.07 (+0.05 - +0.09) |           |             |  |
| rs12393550  | 153758660 | 0.390 | 0.387  | 8.9e-06  | -0.03 (-0.04 - -0.01) | 4.5e-07 | -0.05 (-0.07 - -0.03) | 2.0e-10 | -0.07 (-0.10 - -0.05) |           |             |  |
| rs915941    | 153626649 | 0.481 | 0.462  | 8.4e-05  | -0.02 (-0.03 - -0.01) | 4.7e-06 | -0.04 (-0.06 - -0.03) | 8.3e-09 | -0.06 (-0.08 - -0.04) |           |             |  |
| rs2515905   | 153762075 | 0.269 | 0.259  | 1.0e-04  | -0.03 (-0.05 - -0.02) | 1.6e-04 | -0.05 (-0.08 - -0.02) | 2.1e-06 | -0.08 (-0.11 - -0.05) |           |             |  |
| rs762516    | 153764663 | 0.262 | 0.253  | 1.4e-04  | -0.03 (-0.05 - -0.02) | 3.2e-04 | -0.05 (-0.08 - -0.02) | 5.4e-06 | -0.08 (-0.12 - -0.05) |           |             |  |
| rs2515904   | 153762771 | 0.265 | 0.256  | 1.6e-04  | -0.03 (-0.05 - -0.01) | 3.5e-04 | -0.05 (-0.08 - -0.02) | 3.2e-06 | -0.08 (-0.12 - -0.05) |           |             |  |
| rs111827785 | 153775785 | 0.488 | 0.484  | 2.7e-04  | +0.02 (+0.01 - +0.03) | 9.1e-08 | +0.05 (+0.03 - +0.07) | 6.7e-13 | +0.07 (+0.05 - +0.09) |           |             |  |
| rs60030796  | 153836171 | 0.073 | 0.068  | 1.8e-03  | -0.03 (-0.05 - -0.01) | 6.8e-03 | -0.04 (-0.07 - -0.01) | 1.0e-01 | -0.04 (-0.08 - +0.01) |           |             |  |
| rs7879049   | 153829693 | 0.323 | 0.323  | 5.6e-03  | +0.01 (+0.00 - +0.02) | 7.2e-04 | +0.03 (+0.01 - +0.05) | 7.1e-06 | +0.05 (+0.03 - +0.07) |           |             |  |
| rs73641103  | 153769889 | 0.018 | 0.012  | 3.2e-02  | -0.04 (-0.08 - -0.00) | 4.9e-02 | -0.06 (-0.11 - -0.00) | 1.3e-01 | -0.07 (-0.16 - +0.02) |           |             |  |
| rs5986877   | 153828269 | 0.926 | 0.918  | 7.2e-02  | +0.02 (-0.00 - +0.03) | 1.7e-01 | +0.03 (-0.01 - +0.07) | 9.8e-01 | +0.00 (-0.03 - +0.03) |           |             |  |
| rs2071429   | 153760508 | 0.925 | 0.921  | 8.4e-02  | +0.02 (-0.00 - +0.03) | 1.8e-01 | +0.03 (-0.01 - +0.07) | 9.7e-01 | +0.00 (-0.03 - +0.03) |           |             |  |
| rs7053878   | 153834100 | 0.063 | 0.072  | 1.8e-01  | -0.01 (-0.03 - +0.01) | 5.2e-01 | -0.01 (-0.04 - +0.02) | 3.4e-01 | -0.02 (-0.07 - +0.02) |           |             |  |
| rs77214077  | 153760429 | 0.129 | 0.113  | 2.7e-01  | -0.01 (-0.02 - +0.01) | 6.1e-01 | -0.01 (-0.03 - +0.02) | 3.9e-01 | -0.02 (-0.05 - +0.02) |           |             |  |
| rs762513    | 153675171 | 0.310 | 0.311  | 3.5e-01  | -0.01 (-0.02 - +0.01) | 5.5e-02 | -0.02 (-0.04 - +0.00) | 6.9e-02 | -0.03 (-0.05 - +0.00) |           |             |  |
| rs61042368  | 153755336 | 0.111 | 0.110  | 4.1e-01  | +0.01 (-0.01 - +0.02) | 2.2e-01 | +0.01 (-0.01 - +0.04) | 4.8e-01 | +0.01 (-0.02 - +0.05) |           |             |  |
| rs763737    | 153278307 | 0.611 | 0.607  | 5.0e-01  | +0.00 (-0.01 - +0.01) | 6.8e-01 | -0.00 (-0.02 - +0.02) | 7.2e-01 | -0.00 (-0.02 - +0.01) |           |             |  |
| rs149902811 | 153773160 | 0.014 | 0.021  | 7.7e-01  | -0.01 (-0.04 - +0.03) | 6.0e-01 | -0.01 (-0.06 - +0.04) | 8.2e-01 | -0.01 (-0.11 - +0.09) |           |             |  |
| rs4898389   | 153827637 | 0.935 | 0.928  | 8.5e-01  | +0.00 (-0.02 - +0.02) | 7.9e-01 | +0.01 (-0.04 - +0.05) | 9.9e-02 | -0.02 (-0.05 - +0.00) |           |             |  |
| rs766420    | 153554404 | 0.361 | 0.321  | 8.8e-01  | +0.00 (-0.01 - +0.01) | 3.9e-01 | +0.01 (-0.01 - +0.02) | 7.4e-02 | +0.02 (-0.00 - +0.04) |           |             |  |
| rs12389569  | 153757734 | 0.067 | 0.072  | 8.8e-01  | -0.00 (-0.02 - +0.02) | 7.6e-01 | -0.00 (-0.03 - +0.02) | 4.4e-01 | +0.02 (-0.03 - +0.06) |           |             |  |
| rs113492957 | 153773062 | 0.105 | 0.101  | 8.9e-01  | +0.00 (-0.01 - +0.02) | 5.7e-01 | +0.01 (-0.02 - +0.03) | 9.2e-01 | +0.00 (-0.04 - +0.04) |           |             |  |
| rs73573478  | 153761564 | 0.105 | 0.103  | 9.4e-01  | -0.00 (-0.02 - +0.01) | 8.0e-01 | +0.00 (-0.02 - +0.03) | 9.2e-01 | +0.00 (-0.04 - +0.04) |           |             |  |
| rs2230036   | 153760953 | 0.104 | 0.098  | 9.5e-01  | +0.00 (-0.01 - +0.02) | 7.0e-01 | +0.00 (-0.02 - +0.03) | 8.8e-01 | +0.00 (-0.04 - +0.04) |           |             |  |

**Table S3. Association test results for effects independent of c.202G>A.** Shown here for each SNP surveyed is: genomic position (hg19/GRCh37), DAF stratified by sex, P values and effect sizes (with 95% CI) for c.202G>A-controlled association tests under three different genetic models.
