# Supplementary material for: Genetic determinants of glucose-6-phosphate dehydrogenase activity in Kenya
Source: Springer Nature journal article supplement (doi:10.1186/s12881-014-0093-6), 2014-09-08
Supplement: MOESM6 [file 9741114]

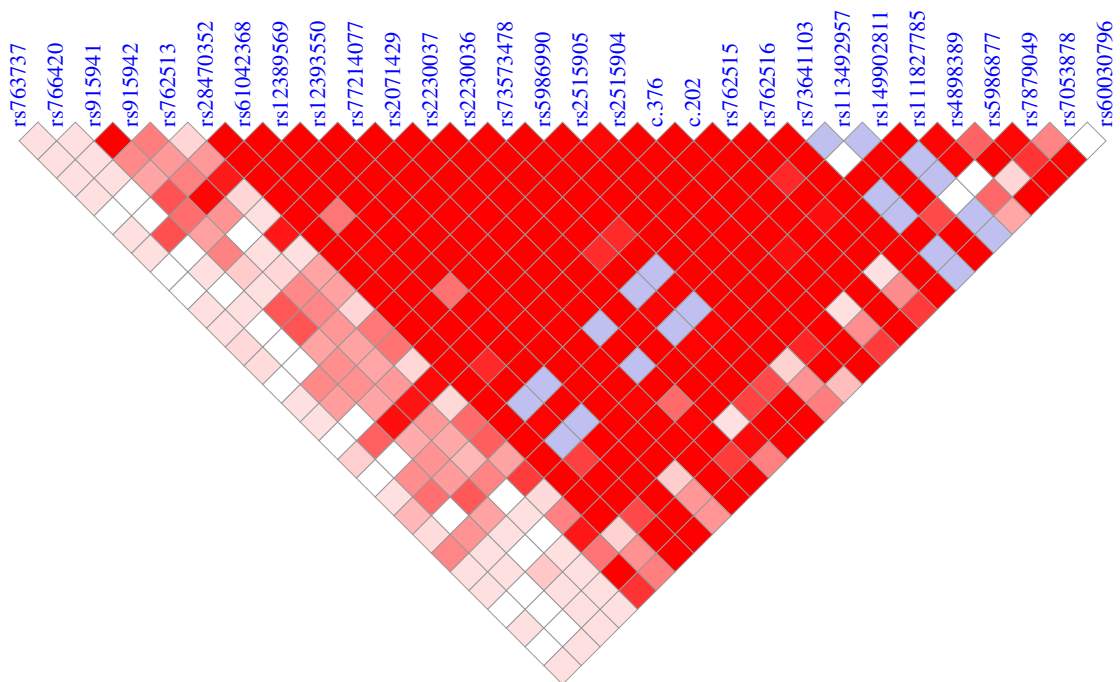

**Figure S3. Linkage disequilibrium (LD) across region.** Pairwise LD matrix is shown in colorimetric form, using the  $D'$  and LOD metrics. Colors indicate:  $D' = 1$  and  $\text{LOD} \geq 2$  (red),  $D' = 1$  and  $\text{LOD} \leq 2$  (blue),  $D' < 1$  and  $\text{LOD} \geq 2$  (pink),  $D' < 1$  and  $\text{LOD} \leq 2$  (white).
