# Supplementary material for: Genetic determinants of glucose-6-phosphate dehydrogenase activity in Kenya
Source: Springer Nature journal article supplement (doi:10.1186/s12881-014-0093-6), 2014-09-08
Supplement: MOESM7 [file 9741114]

**Table S4. Association test results of full-length and partial haplotypes for effects independent of c.202G>A.** Shown here for each haplotype surveyed is: allele identity across all sites (0=ancestral, 1=derived, \_=either), population frequency, P values and effect sizes (with 95% CI) for c.202G>A-controlled association tests.

| Haplotype                      | Frequency | P       | Effect Size              |
|--------------------------------|-----------|---------|--------------------------|
| __01_0__0__1__0000_00__1_____  | 0.188     | 1.1e-06 | +0.025 (+0.015 - +0.036) |
| 100100000011000000000000111100 | 0.055     | 5.0e-05 | +0.036 (+0.019 - +0.053) |
| 101011001010001111011000011000 | 0.044     | 5.6e-04 | -0.034 (-0.053 - -0.015) |
| 011001001010001001010000011101 | 0.021     | 3.0e-03 | -0.042 (-0.069 - -0.014) |
| 111010000011000000000000111000 | 0.021     | 6.0e-03 | +0.038 (+0.011 - +0.065) |
| __10_1__1__0__1111_11__0_____  | 0.219     | 1.6e-02 | -0.016 (-0.030 - -0.003) |
| 111000000110000000000000111100 | 0.016     | 5.5e-02 | -0.030 (-0.061 - +0.001) |
| __10_0__0__0__0000_00__1_____  | 0.072     | 5.7e-02 | -0.015 (-0.030 - +0.000) |
| __10_1__1__0__1001_10__0_____  | 0.092     | 9.7e-02 | -0.012 (-0.025 - +0.002) |
| __10_0__0__0__0000_00__0_____  | 0.013     | 1.1e-01 | -0.029 (-0.064 - +0.006) |
| 100100000110000000000000111000 | 0.022     | 1.5e-01 | +0.020 (-0.007 - +0.046) |
| 1101000001100000000000111100   | 0.017     | 1.7e-01 | +0.021 (-0.009 - +0.052) |
| 111000000000000000000000100010 | 0.014     | 2.0e-01 | -0.022 (-0.056 - +0.012) |
| 1101000001100000000000111000   | 0.037     | 2.0e-01 | +0.014 (-0.007 - +0.035) |
| 000100000110000000000000111000 | 0.019     | 2.3e-01 | -0.018 (-0.046 - +0.011) |
| __00_1__1__0__1001_10__0_____  | 0.015     | 2.3e-01 | -0.020 (-0.051 - +0.012) |
| 100100100010110000000010011100 | 0.014     | 2.4e-01 | +0.020 (-0.013 - +0.054) |
| 000101001010001111011000011000 | 0.024     | 2.4e-01 | -0.015 (-0.041 - +0.010) |
| __01_1__1__0__1111_11__0_____  | 0.036     | 2.9e-01 | -0.011 (-0.032 - +0.010) |
| __01_0__0__0__0000_00__0_____  | 0.098     | 3.2e-01 | +0.007 (-0.007 - +0.020) |
| 111000000000000000000000100000 | 0.013     | 3.5e-01 | -0.017 (-0.051 - +0.018) |
| 1000000011000000000000111000   | 0.035     | 3.8e-01 | -0.010 (-0.031 - +0.012) |
| __10_0__0__1__0000_00__1_____  | 0.058     | 3.9e-01 | +0.007 (-0.009 - +0.024) |
| 010101001010001111011000011000 | 0.010     | 3.9e-01 | -0.017 (-0.056 - +0.022) |
| 0000000011000000000000111000   | 0.015     | 4.0e-01 | +0.014 (-0.018 - +0.046) |
| 010100100010110000000010011100 | 0.014     | 4.9e-01 | +0.012 (-0.021 - +0.045) |
| 001000000000000000000000110010 | 0.017     | 5.1e-01 | -0.010 (-0.041 - +0.020) |
| 100100000000000000000000100010 | 0.013     | 5.1e-01 | -0.011 (-0.046 - +0.023) |
| 0001000001100000000000111000   | 0.011     | 5.2e-01 | +0.012 (-0.025 - +0.050) |
| 101011001010001111111000011000 | 0.145     | 5.7e-01 | +0.005 (-0.012 - +0.021) |
| 000100100010110000000010011100 | 0.042     | 6.1e-01 | +0.005 (-0.015 - +0.025) |
| __01_0__0__0__0000_00__1_____  | 0.083     | 6.1e-01 | -0.004 (-0.018 - +0.011) |
| 111001011010001001010000011000 | 0.017     | 6.9e-01 | +0.006 (-0.024 - +0.037) |
| 001011001010001111111000011000 | 0.017     | 7.6e-01 | -0.005 (-0.037 - +0.027) |
| 1001000001100000000000111000   | 0.019     | 8.0e-01 | -0.004 (-0.032 - +0.025) |
| 011001011010001001010000011000 | 0.043     | 8.4e-01 | +0.002 (-0.017 - +0.021) |
| __01_1__1__0__1001_10__0_____  | 0.016     | 8.6e-01 | +0.003 (-0.028 - +0.034) |
| __00_0__0__0__0000_00__1_____  | 0.063     | 9.7e-01 | +0.000 (-0.016 - +0.017) |
