# Supplementary material for: Genetic determinants of glucose-6-phosphate dehydrogenase activity in Kenya
Source: Springer Nature journal article supplement (doi:10.1186/s12881-014-0093-6), 2014-09-08
Supplement: MOESM9 [file 9741114]

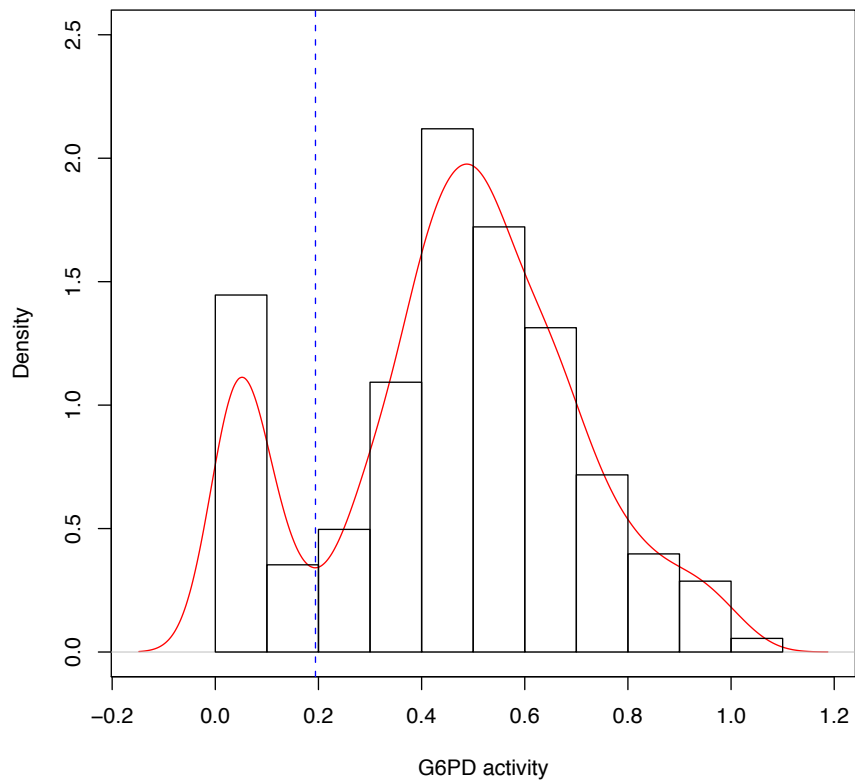

**Figure S5. Defining qualitative G6PD deficiency.** The intermodal minimum in the G6PD activity distribution in males was determined using kernel density estimation of the probability density function (red) and provided our ad hoc cutoff (blue) for distinguishing normal vs. deficient. A histogram of the G6PD activity distribution in males is superimposed for clarity.
